# Supplementary material for: Resveratrol Relieved Acute Liver Damage in Ducks (Anas platyrhynchos) Induced by AFB1 via Modulation of Apoptosis and Nrf2 Signaling Pathways
Source: MDPI journal article supplement (doi:10.3390/ani11123516), 2021-12-10
Supplement: s1 [file s1]

GAPDH

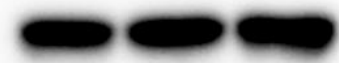

CON AFB1 AFB1+Res

GAPDH

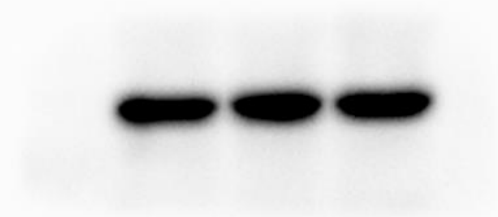

CON AFB1 AFB1+Res

CYP1A1

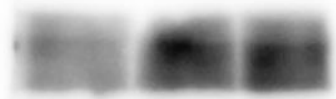

CON AFB1 AFB1+Res

CYP3A4

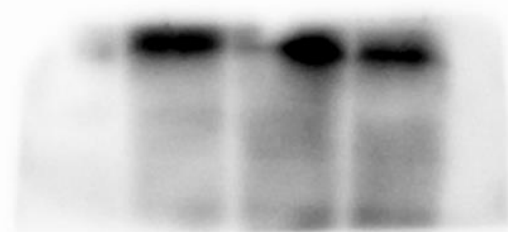

CON AFB1 AFB1+Res

NF-kb/P65

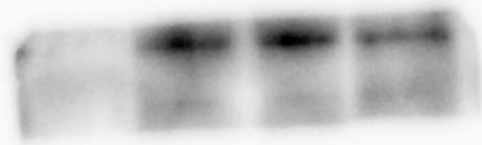

CON AFB1 AFB1+Res

Sirt1

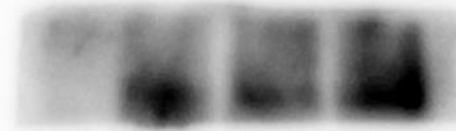

CON AFB1 AFB1+Res

HO-1

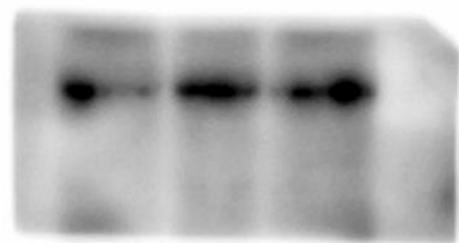

CON AFB1 AFB1+Res

Nrf2

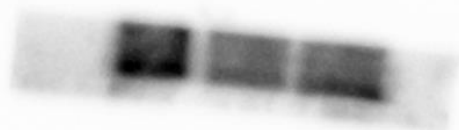

CON AFB1 AFB1+Res



Keap1

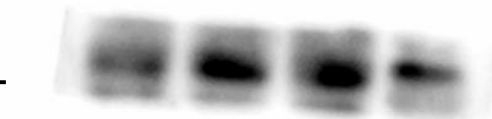

CON AFB1 AFB1+Res

Bax

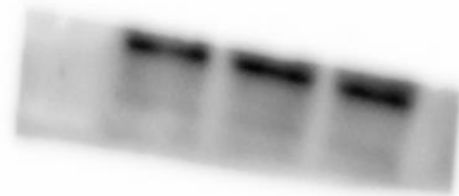

CON AFB1 AFB1+Res

Cyt-c

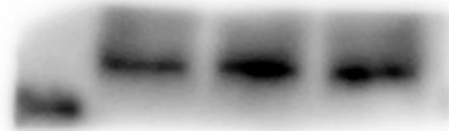

CON AFB1 AFB1+Res

Cleaved  
Caspase9

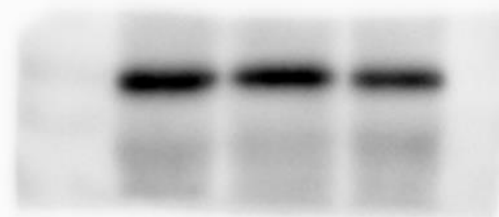

CON AFB1 AFB1+Res

Cleaved  
Caspase3

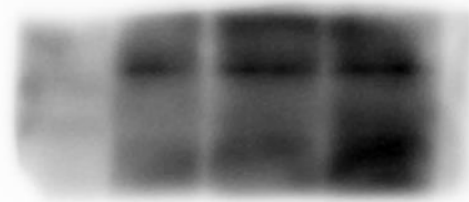

CON AFB1 AFB1+Res

Bcl-2

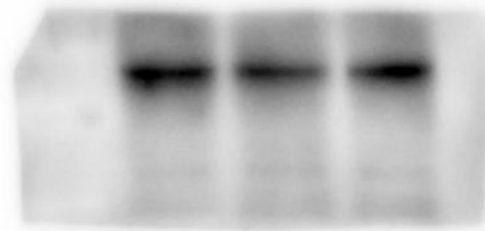

CON AFB1 AFB1+Res
